# Supplementary material for: Development of a chromium-based metal–organic framework, MIL-88B(Cr), modified with deep eutectic solvents for the efficient, simultaneous removal of bisphenol A and bisphenol S
Source: Royal Society of Chemistry journal article supplement (doi:10.1039/d5nj04153h), 2025-12-24
Supplement: d5nj04153h1.pdf [file d5nj04153h1.pdf]

## Supplementary Material

### **Development of a chromium-based metal-organic framework MIL-88B(Cr) modified by deep eutectic solvents for efficient simultaneous removal of bisphenol A and bisphenol S**

**Xiuge Wang<sup>1</sup>, Shenshen Li<sup>1</sup>, Shijiang Huang<sup>1</sup>, Geer Huo<sup>2</sup>, Chenshi Luo<sup>2</sup>, Yongli Liu<sup>2\*</sup>, Guifen Zhu<sup>2\*</sup>**

1. School of Biological Engineering, Xinxiang Institute of Engineering, Xinxiang, Henan 453700, P. R. China.

2. School of Environment, Key Laboratory of Yellow River and Huai River Water Environment and Pollution Control, Ministry of Education, Henan Key Laboratory for Environment Pollution Control, Henan Province's International Joint Laboratory on Key Techniques in Water Treatment, Henan Normal University, Xinxiang, Henan 453007, P. R. China.

---

\* Corresponding author: Tel.: +86 373 3325971; fax: +86 373 3326336.

E-mail address: liuyongli@htu.edu.cn, gfzhu617@163.com

## 1. Materials and instruments

Bisphenol A, bisphenol S, methacrylateethyl trimethyl ammonium chloride (DMC), acrylamide, caffeic acid, 2,2'-azobis(2-methylpropionitrile) (AIBN), and humic acid were purchased from Shanghai Aladdin Biochemical Technology Co., Ltd. Chromium nitrate nonahydrate and sodium hydroxide were obtained from Tianjin Tianli Chemical Reagent Co., Ltd. Terephthalic acid was supplied by Beijing J&K Scientific Ltd. Sodium chloride and N,N-dimethylformamide (DMF) were procured from Tianjin Dern Chemical Reagent Co., Ltd.

The morphologies of samples were observed with a scanning electron microscopy (SEM, JSM-5610LV, JEOL, Japan). Fourier transform infrared spectroscopy (FT-IR, Thermo Nicolet Co., USA) at 4000-400  $\text{cm}^{-1}$  and X-ray powder diffraction (XRD, Brukeraxs Co., Germany) was used to determine the structure of samples. Nitrogen adsorption/desorption isotherms were measured at 77.3 K by a physisorption analyzer (ASAP 2020, Micromeritics, USA). The thermal stability of the polymers was evaluated by a STA449C thermal analyzer (TGA, Netzsch, Germany). The elements and structures of samples by X-ray photoelectron spectroscopy (XPS, ESCALAB250Xi, Thermo Scientific, USA).

## 2. HPLC analysis

All samples in this work were analyzed using a high-performance liquid chromatography (HPLC) system equipped with a diode array detector (DAD) (Agilent 1260 Infinity, USA). Separation of BPA and BPS was performed on a reverse-phase C18 column (250 mm  $\times$  4.6 mm, 5  $\mu\text{m}$ ) with a mobile phase consisting of acetonitrile and water (60:40, v/v) at a flow rate of 1  $\text{mL} \cdot \text{min}^{-1}$ . The column temperature was maintained at 30°C, detection wavelength was set at 277 nm, and the injection volume was 20  $\mu\text{L}$ .

### 3. Optimization of preparation conditions

**Table S1** Effect of DES dosage on the adsorption capacity of polymers for BPS.

| DES dosage (mL) | $Q_{\text{DES@MIL-88B(Cr)}} \text{ (mg g}^{-1}\text{)}$ |
|-----------------|---------------------------------------------------------|
| 0.2             | 78.82                                                   |
| 0.4             | 80.77                                                   |
| 0.6             | 83.48                                                   |
| 0.8             | 85.15                                                   |
| 1.0             | 82.29                                                   |

**Table S2** Effect of MIL-88B(Cr) and H<sub>2</sub>O dosage on the adsorption capacity of polymers for BPS.

| MIL-88B(Cr) dosage (g) | H <sub>2</sub> O dosage (mL) | $Q_{\text{DES@MIL-88B(Cr)}} \text{ (mg g}^{-1}\text{)}$ |
|------------------------|------------------------------|---------------------------------------------------------|
| 0.10                   | 30                           | 72.81                                                   |
| 0.15                   | 30                           | 74.97                                                   |
| 0.20                   | 30                           | 85.96                                                   |
| 0.25                   | 30                           | 81.23                                                   |
| 0.20                   | 20                           | 80.11                                                   |
| 0.20                   | 40                           | 79.48                                                   |
| 0.20                   | 50                           | 76.07                                                   |

### 4. Characterization

**Table S3** Specific surface area and pore structure parameters of MIL-88B(Cr) and DES@MIL-88B(Cr)

| Material    | Specific surface area ( $\text{m}^2 \text{ g}^{-1}$ ) | Total pore volume ( $\text{cm}^3 \text{ g}^{-1}$ ) | Average pore size (nm) |
|-------------|-------------------------------------------------------|----------------------------------------------------|------------------------|
| MIL-88B(Cr) | 19.312                                                | 0.025                                              | 5.275                  |

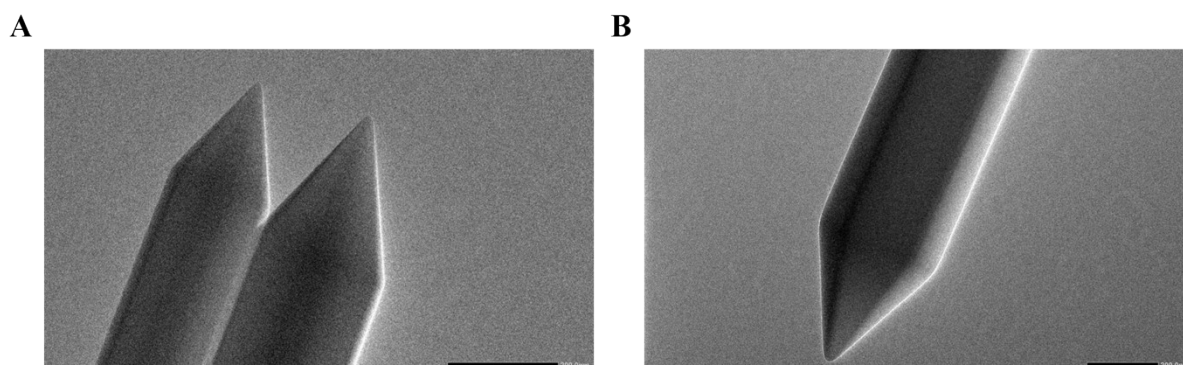

**Fig. S1** TEM images of MIL-88B(Cr) (A), and DES@MIL-88B(Cr) (B).

## 5 Effect of initial pH on adsorption capacity

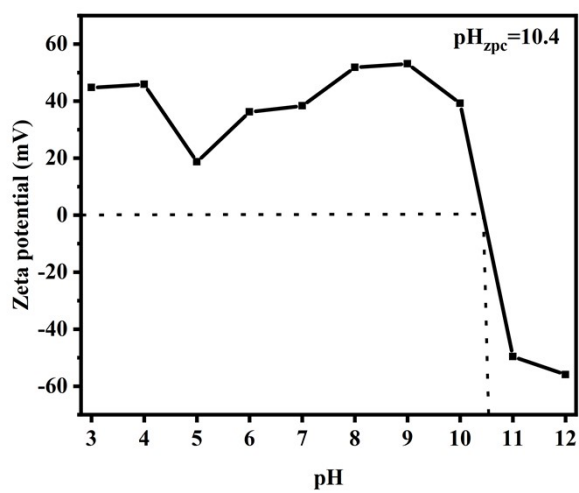

**Fig. S2** Zeta potential of DES@MIL-88B(Cr) at different pH

## 6. Adsorption thermodynamics

**Table S4** Specific surface area and pore structure parameters of MIL-88B(Cr) and DES@MIL-88B(Cr)

|     |                 | T (K)  | $\Delta G^0$ (kJ mol <sup>-1</sup> ) | $\Delta H^0$ (kJ mol <sup>-1</sup> ) | $\Delta S^0$ (kJ mol <sup>-1</sup> K <sup>-1</sup> ) |
|-----|-----------------|--------|--------------------------------------|--------------------------------------|------------------------------------------------------|
| BPA | MIL-88B(Cr)     | 298.15 | -17.98                               | -6.9760                              | 0.0368                                               |
|     |                 | 308.15 | -18.23                               |                                      |                                                      |
|     |                 | 318.15 | -18.72                               |                                      |                                                      |
|     | DES@MIL-88B(Cr) | 298.15 | -17.02                               | -7.1506                              | 0.0332                                               |
|     |                 | 308.15 | -17.46                               |                                      |                                                      |
|     |                 | 318.15 | -17.68                               |                                      |                                                      |
|     | MIL-88B(Cr)     | 298.15 | -19.61                               | -11.7305                             | 0.0264                                               |
|     |                 | 308.15 | -19.81                               |                                      |                                                      |
|     |                 | 318.15 | -20.14                               |                                      |                                                      |
| BPS | DES@MIL-88B(Cr) | 298.15 | -18.72                               | -6.8210                              | 0.0397                                               |
|     |                 | 308.15 | -18.98                               |                                      |                                                      |
|     |                 | 318.15 | -19.52                               |                                      |                                                      |

## 7. Analysis of real samples and reusability

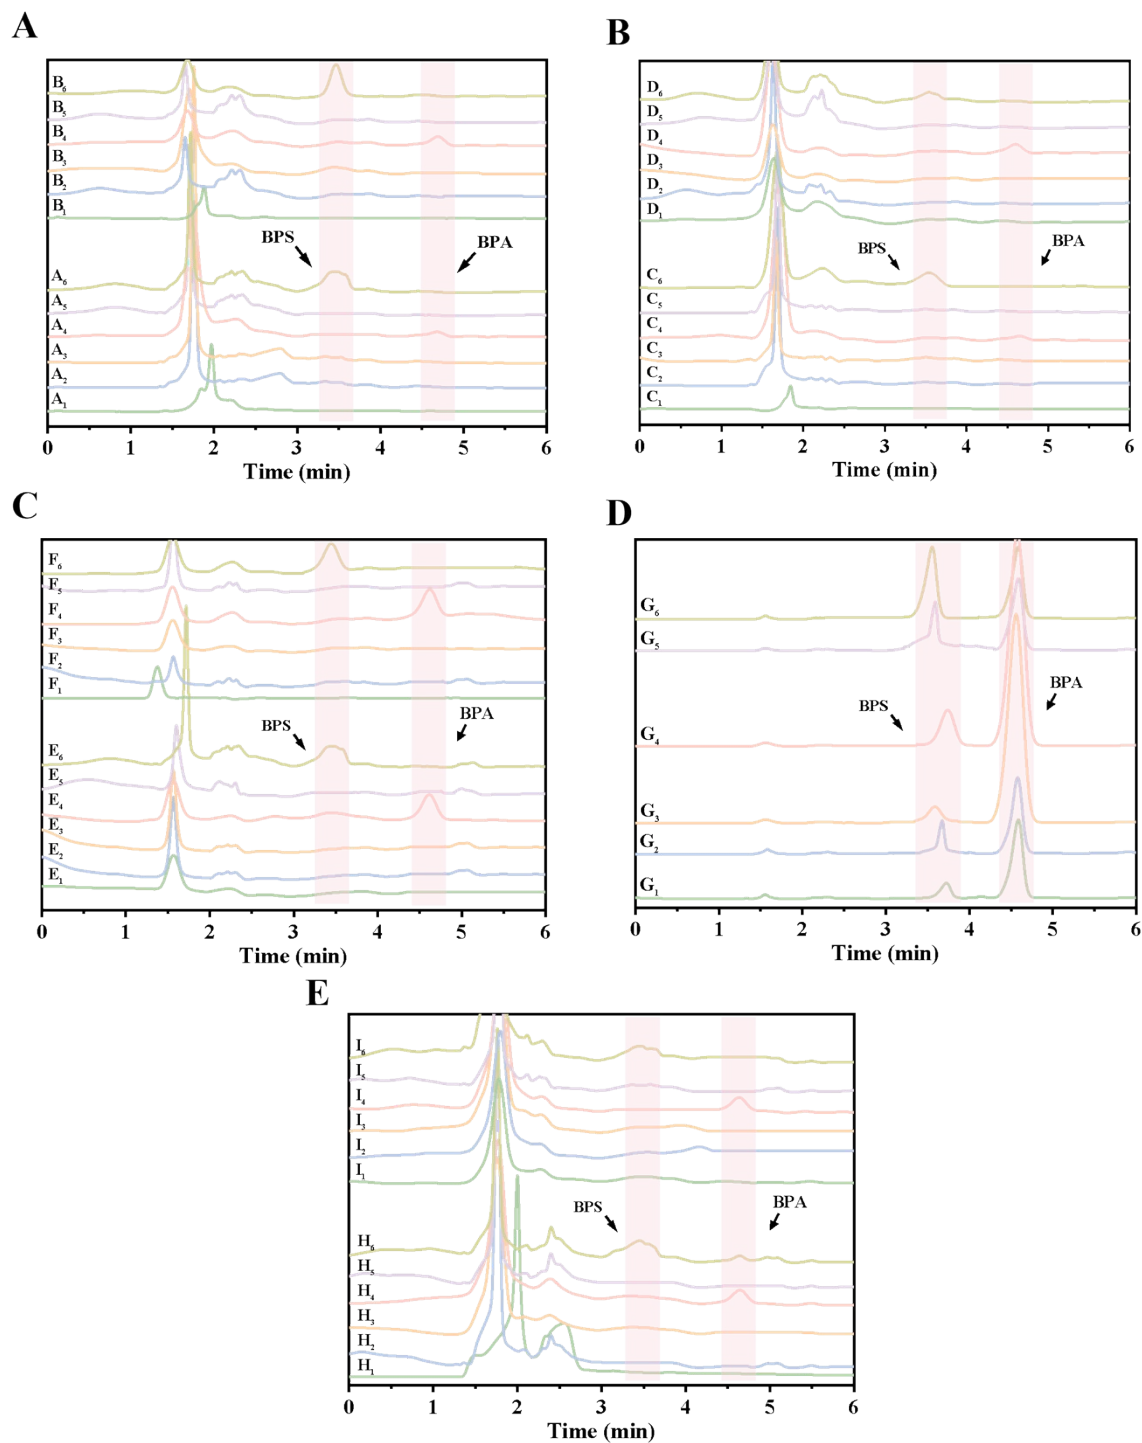

**Fig S3** Chromatograms of blank samples and spiked samples before and after DES@MIL-88B(Cr) extraction. A<sub>1</sub>, B<sub>1</sub>, C<sub>1</sub>, D<sub>1</sub>, E<sub>1</sub>, F<sub>1</sub>, G<sub>1</sub>, H<sub>1</sub> and I<sub>1</sub> respectively represent the chromatograms of lake water 1, lake water 2, river water 1, river water 2, the influent of a certain sewage treatment plant, the effluent of a certain sewage treatment plant, takeout label, plastic plate and plastic spoon before extraction; A<sub>2</sub>, B<sub>2</sub>, C<sub>2</sub>, D<sub>2</sub>, E<sub>2</sub>, F<sub>2</sub>,

G<sub>2</sub>, H<sub>2</sub> and I<sub>2</sub> respectively represent the chromatograms of lake water 1, lake water 2, river water 1, river water 2, the influent of a certain sewage treatment plant, the effluent of a certain sewage treatment plant, takeout label, plastic plate and plastic spoon after DES@MIL-88B(Cr) extraction; A<sub>3</sub>, B<sub>3</sub>, C<sub>3</sub>, D<sub>3</sub>, E<sub>3</sub>, F<sub>3</sub>, G<sub>3</sub>, H<sub>3</sub> and I<sub>3</sub> respectively represent the chromatograms of lake water 1, lake water 2, river water 1, river water 2, the influent of a certain sewage treatment plant, the effluent of a certain sewage treatment plant, takeout label, plastic plate and plastic spoon with spiked BPA before DES@MIL-88B(Cr) extraction; A<sub>4</sub>, B<sub>4</sub>, C<sub>4</sub>, D<sub>4</sub>, E<sub>4</sub>, F<sub>4</sub>, G<sub>4</sub>, H<sub>4</sub> and I<sub>4</sub> respectively represent the chromatograms of lake water 1, lake water 2, river water 1, river water 2, the influent of a certain sewage treatment plant, the effluent of a certain sewage treatment plant, takeout label, plastic plate and plastic spoon with added BPA after DES@MIL-88B(Cr) extraction; A<sub>5</sub>, B<sub>5</sub>, C<sub>5</sub>, D<sub>5</sub>, E<sub>5</sub>, F<sub>5</sub>, G<sub>5</sub>, H<sub>5</sub> and I<sub>5</sub> respectively represent the chromatograms of lake water 1, lake water 2, river water 1, river water 2, the influent of a certain sewage treatment plant, the effluent of a certain sewage treatment plant, takeout label, plastic plate and plastic spoon with spiked BPS before DES@MIL-88B(Cr) extraction; A<sub>6</sub>, B<sub>6</sub>, C<sub>6</sub>, D<sub>6</sub>, E<sub>6</sub>, F<sub>6</sub>, G<sub>6</sub>, H<sub>6</sub> and I<sub>6</sub> respectively represent the chromatograms of lake water 1, lake water 2, river water 1, river water 2, the influent of a certain sewage treatment plant, the effluent of a certain sewage treatment plant, takeout label, plastic plate and plastic spoon with spiked BPS after DES@MIL-88B(Cr) extraction.

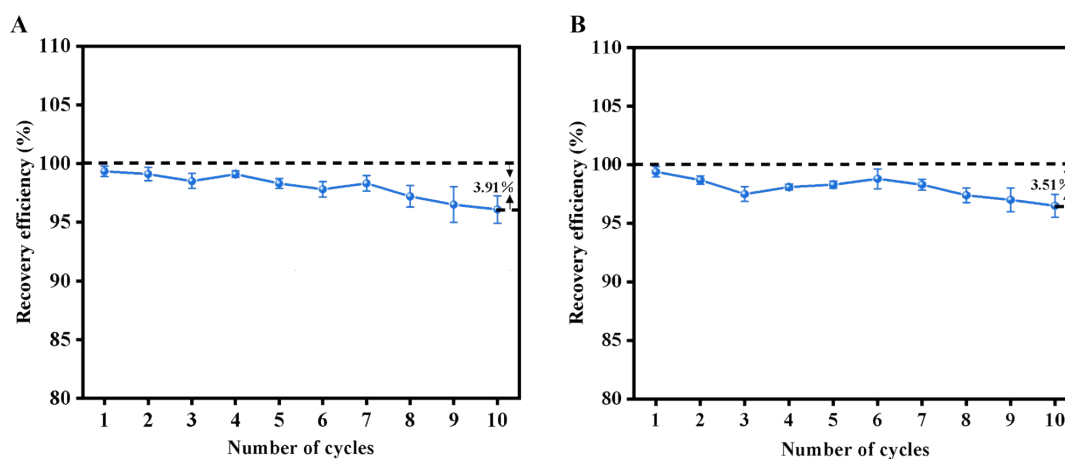

**Fig. S4** (A) The regeneration and recycling performance of DES@MIL-88B(Cr) material for

adsorbing and desorbing BPA, (B) The regeneration and recycling performance of DES@MIL-88B(Cr) material for adsorbing and desorbing BPS.
